# Supplementary material
Source: HighWire-hosted journal article supplement (https://heart.bmj.com/content/104/7/600)
Supplement: inline-supplementary-material-1 [file inline-supplementary-material-1.docx]

# Online Appendix – Read and ICD10 codes for defining hear t failure

Medcode Read Code Text

(from Hawkins et al):

15058 14A6.00 H/O: heart failure

46912 14AM.00 H/O: Heart failure in last year

2062 G58..00 Heart failure

1223 G58..11 Cardiac failure

398 G580.00 Congestive heart failure

2906 G580.11 Congestive cardiac failure

10079 G580.12 Right heart failure

10154 G580.13 Right ventricular failure

9524 G580.14 Biventricular failure

23707 G580000 Acute congestive heart failure

32671 G580100 Chronic congestive heart failure

27884 G580200 Decompensated cardiac failure

11424 G580300 Compensated cardiac failure

94870 G580400 Congestive heart failure due to valvular disease

884 G581.00 Left ventricular failure

23481 G581.11 Asthma - cardiac

43618 G581.12 Pulmonary oedema - acute

5942 G581.13 Impaired left ventricular function

5255 G581000 Acute left ventricular failure

27964 G582.00 Acute heart failure

101138 G583.00 Heart failure with normal ejection fraction

101137 G583.11 HFNEF - heart failure with normal ejection fraction

104275 G584.00

4024 G58z.00 Heart failure NOS

12590 G58z.11 Weak heart

17278 G58z.12 Cardiac failure NOS

8966 G5yy900 Left ventricular systolic dysfunction

12550 G5yyA00 Left ventricular diastolic dysfunction

96799 G5y4z00 Post cardiac operation heart failure NOS

(Extras from our team):

5141 G554000 Congestive cardiomyopathy

9913 1O1..00 Heart failure confirmed

10079 G580.12 Right heart failure

21837 G232.00 Hypertensive heart&renal dis wth (congestive) heart failure

24503 8B29.00 Cardiac failure therapy

30779 662W.00 Heart failure annual review

32898 8H2S.00 Admit heart failure emergency

32945 8CL3.00 Heart failure care plan discussed with patient

66306 SP11111 Heart failure as a complication of care

74131 4271

75877 4270

HES part: all adms with any of these ICD10 codes in any DIAG field:

I11.0 Hypertensive heart disease with (congestive) heart failure;

I25.5 Ischaemic cardiomyopathy;

I42.0 Dilated cardiomyopathy;

I42.9 Cardiomyopathy, unspecified;

I50.0 Congestive heart failure;

I50.1 Left ventricular failure;

I50.9 Heart failure, unspecified ICD10 code

Or this OPCS code in any OPER field:

K617 (which is CRT)
